# Supplementary material for: Text Authorship Identified Using the Dynamics of Word Co-Occurrence Networks
Source: PubMed Central journal article supplement (PMC5268788; doi:10.1371/journal.pone.0170527), 2017-01-26
Supplement: pone.0170527.s001.pdf [file pone.0170527.s001.pdf]

# Supporting Information

For the article: Text authorship identified using the dynamics of word co-occurrence networks

## Collection of texts

---

### Arthur Conan Doyle

|                                              |                                                                            |
|----------------------------------------------|----------------------------------------------------------------------------|
| A Study in Scarlet                           | <a href="http://gutenberg.org/ebooks/244">gutenberg.org/ebooks/244</a>     |
| His Last Bow: An Epilogue of Sherlock Holmes | <a href="http://gutenberg.org/ebooks/2350">gutenberg.org/ebooks/2350</a>   |
| The Adventures of Sherlock Holmes            | <a href="http://gutenberg.org/ebooks/1661">gutenberg.org/ebooks/1661</a>   |
| The Gully of Bluemansdyke                    | <a href="http://gutenberg.org/ebooks/40848">gutenberg.org/ebooks/40848</a> |
| The Hound of the Baskervilles                | <a href="http://gutenberg.org/ebooks/2852">gutenberg.org/ebooks/2852</a>   |
| The Lost World                               | <a href="http://gutenberg.org/ebooks/139">gutenberg.org/ebooks/139</a>     |
| The Memoirs of Sherlock Holmes               | <a href="http://gutenberg.org/ebooks/834">gutenberg.org/ebooks/834</a>     |
| The Return of Sherlock Holmes                | <a href="http://gutenberg.org/ebooks/221">gutenberg.org/ebooks/221</a>     |
| The Sign of the Four                         | <a href="http://gutenberg.org/ebooks/2097">gutenberg.org/ebooks/2097</a>   |
| The Valley of Fear                           | <a href="http://gutenberg.org/ebooks/3289">gutenberg.org/ebooks/3289</a>   |

---

### Bernard Shaw

|                                             |                                                                          |
|---------------------------------------------|--------------------------------------------------------------------------|
| Major Barbara                               | <a href="http://gutenberg.org/ebooks/3790">gutenberg.org/ebooks/3790</a> |
| Man and Superman: A Comedy and a Philosophy | <a href="http://gutenberg.org/ebooks/3328">gutenberg.org/ebooks/3328</a> |
| Mrs. Warren's Profession                    | <a href="http://gutenberg.org/ebooks/1097">gutenberg.org/ebooks/1097</a> |
| Pygmalion                                   | <a href="http://gutenberg.org/ebooks/3825">gutenberg.org/ebooks/3825</a> |
| Caesar and Cleopatra                        | <a href="http://gutenberg.org/ebooks/3329">gutenberg.org/ebooks/3329</a> |
| Cashel Byron's Profession                   | <a href="http://gutenberg.org/ebooks/5872">gutenberg.org/ebooks/5872</a> |
| John Bull's Other Island                    | <a href="http://gutenberg.org/ebooks/3612">gutenberg.org/ebooks/3612</a> |
| An Unsocial Socialist                       | <a href="http://gutenberg.org/ebooks/1654">gutenberg.org/ebooks/1654</a> |
| On the Prospects of Christianity            | <a href="http://gutenberg.org/ebooks/4004">gutenberg.org/ebooks/4004</a> |
| Treatise on Parents and Children            | <a href="http://gutenberg.org/ebooks/908">gutenberg.org/ebooks/908</a>   |

---

### Fyodor Dostoyevsky

|                                          |                                                                            |
|------------------------------------------|----------------------------------------------------------------------------|
| Short Stories                            | <a href="http://gutenberg.org/ebooks/40745">gutenberg.org/ebooks/40745</a> |
| Crime and Punishment                     | <a href="http://gutenberg.org/ebooks/2554">gutenberg.org/ebooks/2554</a>   |
| Notes from the Underground               | <a href="http://gutenberg.org/ebooks/600">gutenberg.org/ebooks/600</a>     |
| Poor Folk                                | <a href="http://gutenberg.org/ebooks/2302">gutenberg.org/ebooks/2302</a>   |
| The Brothers Karamazov                   | <a href="http://gutenberg.org/ebooks/28054">gutenberg.org/ebooks/28054</a> |
| The Gambler                              | <a href="http://gutenberg.org/ebooks/2197">gutenberg.org/ebooks/2197</a>   |
| The Idiot                                | <a href="http://gutenberg.org/ebooks/2638">gutenberg.org/ebooks/2638</a>   |
| The Possessed (The Devils)               | <a href="http://gutenberg.org/ebooks/8117">gutenberg.org/ebooks/8117</a>   |
| Uncle's Dream; and The Permanent Husband | <a href="http://gutenberg.org/ebooks/38241">gutenberg.org/ebooks/38241</a> |
| White Nights and Other Stories           | <a href="http://gutenberg.org/ebooks/36034">gutenberg.org/ebooks/36034</a> |

---

### Herman Melville

|                                             |                                                                            |
|---------------------------------------------|----------------------------------------------------------------------------|
| Mardi: and A Voyage Thither, Vol. I         | <a href="http://gutenberg.org/ebooks/13720">gutenberg.org/ebooks/13720</a> |
| Mardi: and A Voyage Thither, Vol. II        | <a href="http://gutenberg.org/ebooks/13721">gutenberg.org/ebooks/13721</a> |
| Moby Dick; Or, The Whale                    | <a href="http://gutenberg.org/ebooks/2701">gutenberg.org/ebooks/2701</a>   |
| Omoo: Adventures in the South Seas          | <a href="http://gutenberg.org/ebooks/4045">gutenberg.org/ebooks/4045</a>   |
| Pierre; or The Ambiguities                  | <a href="http://gutenberg.org/ebooks/34970">gutenberg.org/ebooks/34970</a> |
| Redburn. His First Voyage                   | <a href="http://gutenberg.org/ebooks/8118">gutenberg.org/ebooks/8118</a>   |
| The Confidence-Man: His Masquerade          | <a href="http://gutenberg.org/ebooks/21816">gutenberg.org/ebooks/21816</a> |
| The Piazza Tales                            | <a href="http://gutenberg.org/ebooks/15859">gutenberg.org/ebooks/15859</a> |
| Typee: A Romance of the South Seas          | <a href="http://gutenberg.org/ebooks/1900">gutenberg.org/ebooks/1900</a>   |
| White Jacket; Or, The World on a Man-of-War | <a href="http://gutenberg.org/ebooks/10712">gutenberg.org/ebooks/10712</a> |

---

---

**Jack London**

|                                  |                                                                          |
|----------------------------------|--------------------------------------------------------------------------|
| Burning Daylight                 | <a href="http://gutenberg.org/ebooks/746">gutenberg.org/ebooks/746</a>   |
| Martin Eden                      | <a href="http://gutenberg.org/ebooks/1056">gutenberg.org/ebooks/1056</a> |
| Michael, Brother of Jerry        | <a href="http://gutenberg.org/ebooks/1730">gutenberg.org/ebooks/1730</a> |
| Smoke Bellew                     | <a href="http://gutenberg.org/ebooks/1596">gutenberg.org/ebooks/1596</a> |
| The Iron Heel                    | <a href="http://gutenberg.org/ebooks/1164">gutenberg.org/ebooks/1164</a> |
| The Jacket (The Star-Rover)      | <a href="http://gutenberg.org/ebooks/1162">gutenberg.org/ebooks/1162</a> |
| The Little Lady of the Big House | <a href="http://gutenberg.org/ebooks/6455">gutenberg.org/ebooks/6455</a> |
| The Mutiny of the Elsinore       | <a href="http://gutenberg.org/ebooks/2415">gutenberg.org/ebooks/2415</a> |
| The Sea-Wolf                     | <a href="http://gutenberg.org/ebooks/1074">gutenberg.org/ebooks/1074</a> |
| The Valley of the Moon           | <a href="http://gutenberg.org/ebooks/1449">gutenberg.org/ebooks/1449</a> |

---

**Jonathan Swift**

|                                                             |                                                                            |
|-------------------------------------------------------------|----------------------------------------------------------------------------|
| Gulliver's Travels into Several Remote Nations of the World | <a href="http://gutenberg.org/ebooks/829">gutenberg.org/ebooks/829</a>     |
| The Journal to Stella                                       | <a href="http://gutenberg.org/ebooks/4208">gutenberg.org/ebooks/4208</a>   |
| The Poems of Jonathan Swift, D.D., Volume 1                 | <a href="http://gutenberg.org/ebooks/14353">gutenberg.org/ebooks/14353</a> |
| The Poems of Jonathan Swift, D.D., Volume 2                 | <a href="http://gutenberg.org/ebooks/13621">gutenberg.org/ebooks/13621</a> |
| The Prose Works of Jonathan Swift, D.D. Volume 03           | <a href="http://gutenberg.org/ebooks/12252">gutenberg.org/ebooks/12252</a> |
| The Prose Works of Jonathan Swift, D.D. Volume 04           | <a href="http://gutenberg.org/ebooks/12746">gutenberg.org/ebooks/12746</a> |
| The Prose Works of Jonathan Swift, D.D. Volume 06           | <a href="http://gutenberg.org/ebooks/12784">gutenberg.org/ebooks/12784</a> |
| The Prose Works of Jonathan Swift, D.D. Volume 07           | <a href="http://gutenberg.org/ebooks/18250">gutenberg.org/ebooks/18250</a> |
| The Prose Works of Jonathan Swift, D.D. Volume 09           | <a href="http://gutenberg.org/ebooks/13169">gutenberg.org/ebooks/13169</a> |
| The Prose Works of Jonathan Swift, D.D. Volume 10           | <a href="http://gutenberg.org/ebooks/13040">gutenberg.org/ebooks/13040</a> |

---

**Leo Tolstoy**

|                                                     |                                                                            |
|-----------------------------------------------------|----------------------------------------------------------------------------|
| Anna Karenina                                       | <a href="http://gutenberg.org/ebooks/1399">gutenberg.org/ebooks/1399</a>   |
| Redemption and two other plays                      | <a href="http://gutenberg.org/ebooks/9792">gutenberg.org/ebooks/9792</a>   |
| Resurrection                                        | <a href="http://gutenberg.org/ebooks/1938">gutenberg.org/ebooks/1938</a>   |
| The Awakening                                       | <a href="http://gutenberg.org/ebooks/17352">gutenberg.org/ebooks/17352</a> |
| The Cossacks: A Tale of 1852                        | <a href="http://gutenberg.org/ebooks/4761">gutenberg.org/ebooks/4761</a>   |
| The Kingdom of God Is Within You                    | <a href="http://gutenberg.org/ebooks/4602">gutenberg.org/ebooks/4602</a>   |
| War and Peace                                       | <a href="http://gutenberg.org/ebooks/2600">gutenberg.org/ebooks/2600</a>   |
| What Shall We Do?                                   | <a href="http://gutenberg.org/ebooks/38690">gutenberg.org/ebooks/38690</a> |
| What to Do? Thoughts Evoked by the Census of Moscow | <a href="http://gutenberg.org/ebooks/3630">gutenberg.org/ebooks/3630</a>   |
| Youth                                               | <a href="http://gutenberg.org/ebooks/2637">gutenberg.org/ebooks/2637</a>   |

---

**Nathaniel Hawthorne**

|                                                           |                                                                            |
|-----------------------------------------------------------|----------------------------------------------------------------------------|
| True Stories of History and Biography                     | <a href="http://gutenberg.org/ebooks/15697">gutenberg.org/ebooks/15697</a> |
| The Scarlet Letter                                        | <a href="http://gutenberg.org/ebooks/33">gutenberg.org/ebooks/33</a>       |
| The Marble Faun; Or, The Romance of Monte Beni - Volume 2 | <a href="http://gutenberg.org/ebooks/2182">gutenberg.org/ebooks/2182</a>   |
| Doctor Grimshawe's Secret                                 | <a href="http://gutenberg.org/ebooks/7183">gutenberg.org/ebooks/7183</a>   |
| Passages from the English Notebooks, Complete             | <a href="http://gutenberg.org/ebooks/7878">gutenberg.org/ebooks/7878</a>   |
| Passages from the French and Italian Notebooks, Volume 1  | <a href="http://gutenberg.org/ebooks/7879">gutenberg.org/ebooks/7879</a>   |
| Passages from the French and Italian Notebooks, Volume 2  | <a href="http://gutenberg.org/ebooks/7880">gutenberg.org/ebooks/7880</a>   |
| Our Old Home: A Series of English Sketches                | <a href="http://gutenberg.org/ebooks/8090">gutenberg.org/ebooks/8090</a>   |
| Sketches and Studies                                      | <a href="http://gutenberg.org/ebooks/8091">gutenberg.org/ebooks/8091</a>   |
| Twice Told Tales                                          | <a href="http://gutenberg.org/ebooks/13707">gutenberg.org/ebooks/13707</a> |

---

## Success scores using Isomap

The results of classification after applying Isomap for the various classification algorithms are presented as histograms in figure S1, where each figure includes the 196 cases obtained by varying both  $n_{components}$  and  $n_{neighbors}$  from 2 to 15. For all algorithms the histograms are leaned to the right, reflecting that in the majority of cases a high score is obtained. The maximum value was 88.75% obtained with KNN as shown in figure S1b. For this classification algorithm the results are presented in detail in table 1.

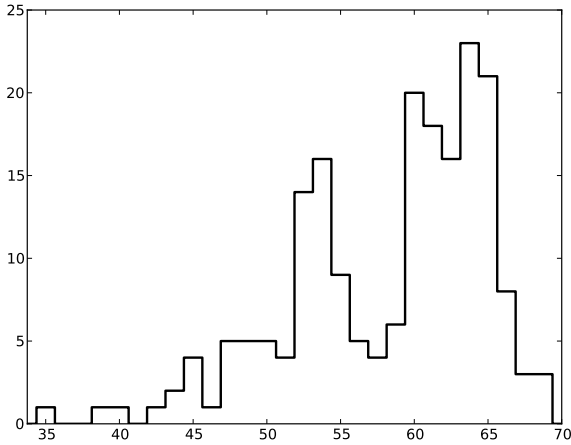

(a) J48 scores (%).

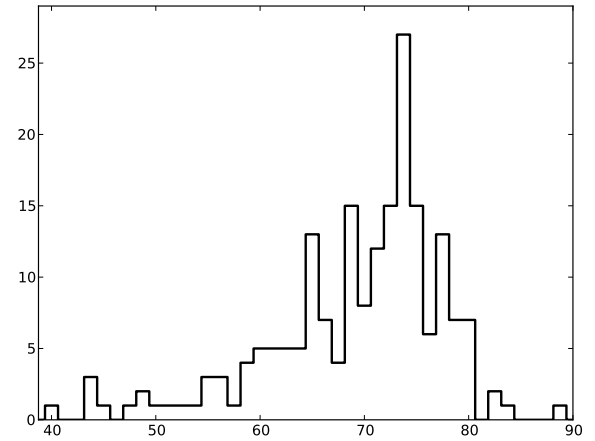

(b) KNN scores (%).

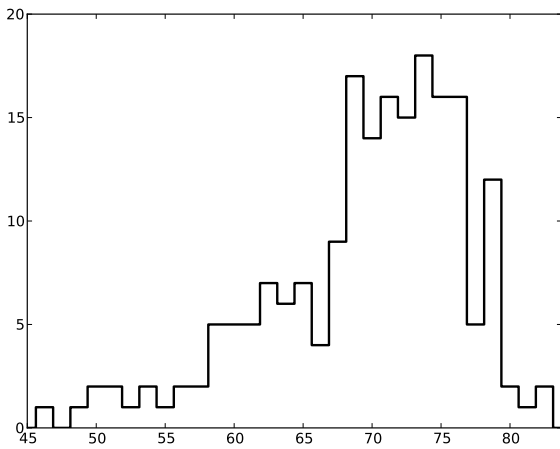

(c) Naive Bayes scores (%).

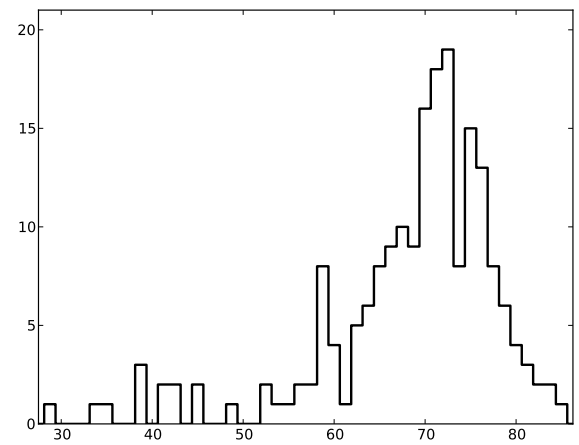

(d) RBFNetwork scores (%).

Figure S 1: Success scores after applying Isomap. Parameters  $n_{components}$  and  $n_{neighbors}$  of Isomap were varied from 2 to 15 giving a total of 196 scores. Histograms show a similar behavior for most values of the parameters having a peak at the right side of each figure and therefore high values for the scores.

Table S 1: Scores obtained with KNN after applying Isomap for different values of the parameters  $n_{components}$  and  $n_{neighbors}$ .

| $n_{comp}$ | $n_{neigh}$ | Score | $n_{comp}$ | $n_{neigh}$ | Score | $n_{comp}$ | $n_{neigh}$ | Score        | $n_{comp}$ | $n_{neigh}$ | Score |
|------------|-------------|-------|------------|-------------|-------|------------|-------------|--------------|------------|-------------|-------|
| 2          | 2           | 53.75 | 5          | 9           | 68.75 | 9          | 2           | 72.50        | 12         | 9           | 71.25 |
| 2          | 3           | 72.50 | 5          | 10          | 77.50 | 9          | 3           | 76.25        | 12         | 10          | 76.25 |
| 2          | 4           | 48.75 | 5          | 11          | 71.25 | 9          | 4           | 68.75        | 12         | 11          | 73.75 |
| 2          | 5           | 52.50 | 5          | 12          | 75.00 | 9          | 5           | 75.00        | 12         | 12          | 68.75 |
| 2          | 6           | 65.00 | 5          | 13          | 72.50 | 9          | 6           | 73.75        | 12         | 13          | 68.75 |
| 2          | 7           | 58.75 | 5          | 14          | 63.75 | 9          | 7           | 80.00        | 12         | 14          | 61.25 |
| 2          | 8           | 47.50 | 5          | 15          | 65.00 | 9          | 8           | 75.00        | 12         | 15          | 65.00 |
| 2          | 9           | 45.00 | 6          | 2           | 62.50 | 9          | 9           | 72.50        | 13         | 2           | 63.75 |
| 2          | 10          | 48.75 | 6          | 3           | 73.75 | 9          | 10          | 78.75        | 13         | 3           | 77.50 |
| 2          | 11          | 43.75 | 6          | 4           | 56.25 | 9          | 11          | 78.75        | 13         | 4           | 71.25 |
| 2          | 12          | 43.75 | 6          | 5           | 65.00 | 9          | 12          | 72.50        | 13         | 5           | 61.25 |
| 2          | 13          | 40.00 | 6          | 6           | 71.25 | 9          | 13          | 75.00        | 13         | 6           | 73.75 |
| 2          | 14          | 50.00 | 6          | 7           | 77.50 | 9          | 14          | 60.00        | 13         | 7           | 77.50 |
| 2          | 15          | 43.75 | 6          | 8           | 77.50 | 9          | 15          | 68.75        | 13         | 8           | 72.50 |
| 3          | 2           | 61.25 | 6          | 9           | 72.50 | 10         | 2           | 73.75        | 13         | 9           | 73.75 |
| 3          | 3           | 71.25 | 6          | 10          | 78.75 | 10         | 3           | 77.50        | 13         | 10          | 82.50 |
| 3          | 4           | 51.25 | 6          | 11          | 70.00 | 10         | 4           | 67.50        | 13         | 11          | 73.75 |
| 3          | 5           | 55.00 | 6          | 12          | 75.00 | 10         | 5           | 73.75        | 13         | 12          | 70.00 |
| 3          | 6           | 67.50 | 6          | 13          | 73.75 | 10         | 6           | 73.75        | 13         | 13          | 66.25 |
| 3          | 7           | 73.75 | 6          | 14          | 62.50 | 10         | 7           | 80.00        | 13         | 14          | 60.00 |
| 3          | 8           | 78.75 | 6          | 15          | 65.00 | 10         | 8           | 70.00        | 13         | 15          | 66.25 |
| 3          | 9           | 70.00 | 7          | 2           | 63.75 | 10         | 9           | 72.50        | 14         | 2           | 62.50 |
| 3          | 10          | 80.00 | 7          | 3           | 73.75 | <b>10</b>  | <b>10</b>   | <b>88.75</b> | 14         | 3           | 77.50 |
| 3          | 11          | 70.00 | 7          | 4           | 58.75 | 10         | 11          | 78.75        | 14         | 4           | 68.75 |
| 3          | 12          | 71.25 | 7          | 5           | 75.00 | 10         | 12          | 73.75        | 14         | 5           | 61.25 |
| 3          | 13          | 73.75 | 7          | 6           | 68.75 | 10         | 13          | 73.75        | 14         | 6           | 73.75 |
| 3          | 14          | 55.00 | 7          | 7           | 78.75 | 10         | 14          | 60.00        | 14         | 7           | 77.50 |
| 3          | 15          | 56.25 | 7          | 8           | 73.75 | 10         | 15          | 68.75        | 14         | 8           | 73.75 |
| 4          | 2           | 60.00 | 7          | 9           | 72.50 | 11         | 2           | 65.00        | 14         | 9           | 73.75 |
| 4          | 3           | 68.75 | 7          | 10          | 77.50 | 11         | 3           | 77.50        | 14         | 10          | 82.50 |
| 4          | 4           | 62.50 | 7          | 11          | 68.75 | 11         | 4           | 66.25        | 14         | 11          | 72.50 |
| 4          | 5           | 66.25 | 7          | 12          | 75.00 | 11         | 5           | 77.50        | 14         | 12          | 70.00 |
| 4          | 6           | 73.75 | 7          | 13          | 73.75 | 11         | 6           | 73.75        | 14         | 13          | 65.00 |
| 4          | 7           | 76.25 | 7          | 14          | 63.75 | 11         | 7           | 80.00        | 14         | 14          | 57.50 |
| 4          | 8           | 77.50 | 7          | 15          | 65.00 | 11         | 8           | 72.50        | 14         | 15          | 66.25 |
| 4          | 9           | 71.25 | 8          | 2           | 68.75 | 11         | 9           | 73.75        | 15         | 2           | 65.00 |
| 4          | 10          | 76.25 | 8          | 3           | 75.00 | 11         | 10          | 80.00        | 15         | 3           | 80.00 |
| 4          | 11          | 67.50 | 8          | 4           | 63.75 | 11         | 11          | 73.75        | 15         | 4           | 68.75 |
| 4          | 12          | 71.25 | 8          | 5           | 76.25 | 11         | 12          | 72.50        | 15         | 5           | 62.50 |
| 4          | 13          | 72.50 | 8          | 6           | 68.75 | 11         | 13          | 71.25        | 15         | 6           | 72.50 |
| 4          | 14          | 56.25 | 8          | 7           | 83.75 | 11         | 14          | 58.75        | 15         | 7           | 77.50 |
| 4          | 15          | 60.00 | 8          | 8           | 73.75 | 11         | 15          | 66.25        | 15         | 8           | 75.00 |
| 5          | 2           | 65.00 | 8          | 9           | 71.25 | 12         | 2           | 65.00        | 15         | 9           | 75.00 |
| 5          | 3           | 68.75 | 8          | 10          | 78.75 | 12         | 3           | 75.00        | 15         | 10          | 75.00 |
| 5          | 4           | 55.00 | 8          | 11          | 75.00 | 12         | 4           | 66.25        | 15         | 11          | 70.00 |
| 5          | 5           | 65.00 | 8          | 12          | 70.00 | 12         | 5           | 68.75        | 15         | 12          | 73.75 |
| 5          | 6           | 75.00 | 8          | 13          | 72.50 | 12         | 6           | 75.00        | 15         | 13          | 71.25 |
| 5          | 7           | 73.75 | 8          | 14          | 61.25 | 12         | 7           | 80.00        | 15         | 14          | 58.75 |
| 5          | 8           | 76.25 | 8          | 15          | 65.00 | 12         | 8           | 71.25        | 15         | 15          | 67.50 |

## Tests results

The features of a time series can be tested with the so-called unit root tests. These tests assume a null hypothesis and verify whether the hypothesis can be rejected in which case an alternative hypothesis is considered. Each one of the tests has a particular null hypothesis and alternative hypothesis, and each test considers different evidences to accept or reject the hypotheses. The Kwiatkowski-Phillips-Schmidt-Shin (KPSS) test is the only one that considers trend-stationarity as the null hypothesis, the alternative hypothesis being the presence of a unit root. For the Phillips-Perron test, the null hypothesis is that the series is integrated of order 1. We considered also the Augmented Dickey-Fuller test for which the null hypothesis is the presence of a unit root. Finally, McKinnon also considers the presence of a unit root as its null hypothesis but uses alternative distributions to estimate the  $p_{value}$  (columns 5 and 6 in table 2 correspond to finite sample and asymptotic tests). It must be noted that the results obtained in table 2 are averages over the 80 books instead of the results for a single series.

Table S 2: Averages of  $p_{values}$  obtained with various tests.

|                        | <b>Phillips-Perron</b> | <b>KPSS</b> | <b>Dickey-Fuller</b> | <b>McKinnon</b> |       |
|------------------------|------------------------|-------------|----------------------|-----------------|-------|
| Clustering             | 0.010                  | 0.071       | 0.017                | 0.008           | 0.167 |
| Betweenness centrality | 0.023                  | 0.074       | 0.350                | 0.360           | 0.510 |
| Cliques                | 0.010                  | 0.086       | 0.377                | 0.393           | 0.521 |
| Diameter               | 0.010                  | 0.076       | 0.116                | 0.111           | 0.365 |
| Intermittency          | 0.010                  | 0.071       | 0.080                | 0.074           | 0.335 |
| Load centrality        | 0.081                  | 0.080       | 0.457                | 0.478           | 0.583 |
| Degree                 | 0.019                  | 0.066       | 0.470                | 0.513           | 0.579 |
| Radius                 | 0.011                  | 0.073       | 0.118                | 0.114           | 0.368 |
| Shortest path          | 0.013                  | 0.071       | 0.214                | 0.208           | 0.430 |
| Edges                  | 0.253                  | 0.078       | 0.362                | 0.369           | 0.512 |
| Nodes                  | 0.022                  | 0.067       | 0.368                | 0.378           | 0.514 |
| Transitivity           | 0.010                  | 0.083       | 0.014                | 0.005           | 0.126 |

## ARIMA fittings

The  $80 \times 12 = 960$  series were fitted as ARIMA( $p,d,q$ ) processes. Each table corresponds to a parameter and each entry in the table corresponds to the number of series that were fitted with the parameter set to the value indexed by the column. Table 6 corresponds to the sum  $p + d + q$ .

Table S 3: Number of series fitted with an ARIMA( $p,d,q$ ) model for each value of parameter  $p$ .

| Network metric         | Value of $p$ |     |     |    |    |   |   |   |   |   |
|------------------------|--------------|-----|-----|----|----|---|---|---|---|---|
|                        | 0            | 1   | 2   | 3  | 4  | 5 | 6 | 7 | 8 | 9 |
| Clustering             | 36           | 27  | 11  | 5  | 1  | 0 | 0 | 0 | 0 | 0 |
| Betweenness centrality | 25           | 37  | 12  | 6  | 0  | 0 | 0 | 0 | 0 | 0 |
| Cliques                | 59           | 11  | 7   | 2  | 1  | 0 | 0 | 0 | 0 | 0 |
| Diameter               | 32           | 32  | 8   | 8  | 0  | 0 | 0 | 0 | 0 | 0 |
| Intermittency          | 27           | 34  | 13  | 5  | 1  | 0 | 0 | 0 | 0 | 0 |
| Load centrality        | 35           | 28  | 9   | 7  | 0  | 1 | 0 | 0 | 0 | 0 |
| Degree                 | 28           | 36  | 11  | 3  | 1  | 1 | 0 | 0 | 0 | 0 |
| Radius                 | 27           | 32  | 14  | 7  | 0  | 0 | 0 | 0 | 0 | 0 |
| Shortest path          | 25           | 26  | 21  | 4  | 3  | 1 | 0 | 0 | 0 | 0 |
| Edges                  | 40           | 25  | 8   | 6  | 1  | 0 | 0 | 0 | 0 | 0 |
| Nodes                  | 27           | 33  | 13  | 5  | 1  | 1 | 0 | 0 | 0 | 0 |
| Transitivity           | 51           | 20  | 6   | 1  | 2  | 0 | 0 | 0 | 0 | 0 |
| Total                  | 412          | 341 | 133 | 59 | 11 | 4 | 0 | 0 | 0 | 0 |

Table S 4: Number of series fitted with an ARIMA( $p,d,q$ ) model for each value of parameter  $d$ .

| Network metric         | Value of $d$ |     |   |   |   |   |   |   |   |   |
|------------------------|--------------|-----|---|---|---|---|---|---|---|---|
|                        | 0            | 1   | 2 | 3 | 4 | 5 | 6 | 7 | 8 | 9 |
| Clustering             | 55           | 25  | 0 | 0 | 0 | 0 | 0 | 0 | 0 | 0 |
| Betweenness centrality | 57           | 23  | 0 | 0 | 0 | 0 | 0 | 0 | 0 | 0 |
| Cliques                | 69           | 11  | 0 | 0 | 0 | 0 | 0 | 0 | 0 | 0 |
| Diameter               | 60           | 20  | 0 | 0 | 0 | 0 | 0 | 0 | 0 | 0 |
| Intermittency          | 56           | 24  | 0 | 0 | 0 | 0 | 0 | 0 | 0 | 0 |
| Load centrality        | 63           | 17  | 0 | 0 | 0 | 0 | 0 | 0 | 0 | 0 |
| Degree                 | 51           | 29  | 0 | 0 | 0 | 0 | 0 | 0 | 0 | 0 |
| Radius                 | 58           | 22  | 0 | 0 | 0 | 0 | 0 | 0 | 0 | 0 |
| Shortest path          | 55           | 25  | 0 | 0 | 0 | 0 | 0 | 0 | 0 | 0 |
| Edges                  | 61           | 19  | 0 | 0 | 0 | 0 | 0 | 0 | 0 | 0 |
| Nodes                  | 49           | 31  | 0 | 0 | 0 | 0 | 0 | 0 | 0 | 0 |
| Transitivity           | 64           | 16  | 0 | 0 | 0 | 0 | 0 | 0 | 0 | 0 |
| Total                  | 698          | 262 | 0 | 0 | 0 | 0 | 0 | 0 | 0 | 0 |

Table S 5: Number of series fitted with an ARIMA(p,d,q) model for each value of parameter  $q$ .

| Network metric         | Value of $q$ |     |     |    |   |   |   |   |   |   |
|------------------------|--------------|-----|-----|----|---|---|---|---|---|---|
|                        | 0            | 1   | 2   | 3  | 4 | 5 | 6 | 7 | 8 | 9 |
| Clustering             | 31           | 29  | 13  | 6  | 1 | 0 | 0 | 0 | 0 | 0 |
| Betweenness centrality | 16           | 42  | 16  | 6  | 0 | 0 | 0 | 0 | 0 | 0 |
| Cliques                | 53           | 16  | 10  | 1  | 0 | 0 | 0 | 0 | 0 | 0 |
| Diameter               | 27           | 36  | 11  | 5  | 1 | 0 | 0 | 0 | 0 | 0 |
| Intermittency          | 21           | 38  | 19  | 2  | 0 | 0 | 0 | 0 | 0 | 0 |
| Load centrality        | 32           | 33  | 10  | 4  | 1 | 0 | 0 | 0 | 0 | 0 |
| Degree                 | 21           | 44  | 12  | 2  | 0 | 1 | 0 | 0 | 0 | 0 |
| Radius                 | 27           | 32  | 18  | 3  | 0 | 0 | 0 | 0 | 0 | 0 |
| Shortest path          | 23           | 40  | 10  | 6  | 1 | 0 | 0 | 0 | 0 | 0 |
| Edges                  | 35           | 29  | 10  | 4  | 1 | 1 | 0 | 0 | 0 | 0 |
| Nodes                  | 26           | 40  | 11  | 3  | 0 | 0 | 0 | 0 | 0 | 0 |
| Transitivity           | 39           | 27  | 13  | 1  | 0 | 0 | 0 | 0 | 0 | 0 |
| Total                  | 351          | 406 | 153 | 43 | 5 | 2 | 0 | 0 | 0 | 0 |

Table S 6: Number of series fitted with an ARIMA(p,d,q) model for each value of the sum  $p + d + q$ .

| Network metric         | Value of $p + d + q$ |     |     |     |     |    |    |    |   |   |
|------------------------|----------------------|-----|-----|-----|-----|----|----|----|---|---|
|                        | 0                    | 1   | 2   | 3   | 4   | 5  | 6  | 7  | 8 | 9 |
| Clustering             | 20                   | 15  | 16  | 10  | 12  | 2  | 2  | 1  | 2 | 0 |
| Betweenness centrality | 9                    | 9   | 27  | 19  | 9   | 4  | 3  | 0  | 0 | 0 |
| Cliques                | 42                   | 14  | 11  | 5   | 6   | 2  | 0  | 0  | 0 | 0 |
| Diameter               | 13                   | 20  | 20  | 11  | 9   | 4  | 1  | 2  | 0 | 0 |
| Intermittency          | 8                    | 20  | 17  | 17  | 11  | 6  | 1  | 0  | 0 | 0 |
| Load centrality        | 18                   | 19  | 17  | 14  | 4   | 5  | 1  | 1  | 0 | 1 |
| Degree                 | 8                    | 16  | 24  | 16  | 10  | 5  | 0  | 1  | 0 | 0 |
| Radius                 | 13                   | 16  | 20  | 12  | 11  | 5  | 2  | 1  | 0 | 0 |
| Shortest path          | 8                    | 18  | 20  | 11  | 12  | 3  | 6  | 2  | 0 | 0 |
| Edges                  | 21                   | 21  | 12  | 10  | 9   | 4  | 1  | 1  | 1 | 0 |
| Nodes                  | 9                    | 19  | 21  | 13  | 10  | 4  | 3  | 1  | 0 | 0 |
| Transitivity           | 32                   | 16  | 13  | 9   | 7   | 1  | 1  | 1  | 0 | 0 |
| Total                  | 201                  | 203 | 218 | 147 | 110 | 45 | 21 | 11 | 3 | 1 |

Table S 7: Series fitted with an ARIMA(p,d,q) model having the biggest values of the sum  $p + d + q$ .

| Book                                        | Measure         | Sum | ARIMA(p,d,q) |     |     |
|---------------------------------------------|-----------------|-----|--------------|-----|-----|
|                                             |                 |     | $p$          | $d$ | $q$ |
| The Poems of Jonathan Swift, D.D., Volume 2 | Load centrality | 9   | 5            | 0   | 4   |
| The Journal to Stella                       | Clustering      | 8   | 2            | 1   | 5   |
| The Iron Heel                               | Clustering      | 8   | 3            | 1   | 4   |
| Typee: A Romance of the South Seas          | Edges           | 8   | 4            | 1   | 3   |
